# Supplementary material
Source: PubMed Central journal article supplement (PMC7687926)
Supplement: boe-11-11-6458-s001.pdf [file boe-11-11-6458-s001.pdf]

## Evaluation of bone perfusion during open orthopedic surgery using quantitative dynamic contrast-enhanced fluorescence imaging: supplement

I. LEAH GITAJN,<sup>1,4</sup> JONATHAN T. ELLIOTT,<sup>2,3</sup> JASON R. GUNN,<sup>3</sup>  
ALBERTO J. RUIZ,<sup>3</sup> ERIC R. HENDERSON,<sup>1</sup> BRIAN W. POGUE,<sup>3</sup>   
AND SHUDONG JIANG<sup>3,5</sup> 

<sup>1</sup>Department of Orthopaedics, Dartmouth-Hitchcock Medical Center, 1 Medical Dr., Lebanon, NH 03766, USA

<sup>2</sup>Department of Surgery, Dartmouth-Hitchcock Medical Center, 1 Medical Dr., Lebanon, NH 03766, USA

<sup>3</sup>Thayer School of Engineering, Dartmouth College, 14 Engineering Dr. Hanover, NH 03755, USA

<sup>4</sup>Ida.Leah.Gitajn@hitchcock.org

<sup>5</sup>Shudong.jiang@dartmouth.edu

---

This supplement published with The Optical Society on 19 October 2020 by The Authors under the terms of the [Creative Commons Attribution 4.0 License](https://creativecommons.org/licenses/by/4.0/) in the format provided by the authors and unedited. Further distribution of this work must maintain attribution to the author(s) and the published article's title, journal citation, and DOI.

Supplement DOI: <https://doi.org/10.6084/m9.figshare.13017173>

Parent Article DOI: <https://doi.org/10.1364/BOE.399587>

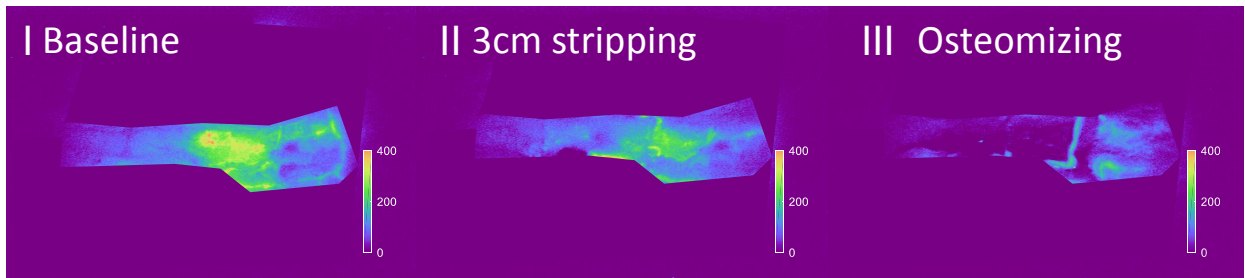

Supplemental figure 1: ICG fluorescence maps at each condition of 11th tibia. To enhance visualization, the region corresponding to the bone only was segmented Q1 from the surrounding soft tissue, using white light images as a guide.
